# Supplementary material for: Ribosome profiling reveals post-transcriptional buffering of divergent gene expression in yeast
Source: PubMed Central journal article supplement — Genome Res. 2014 Mar;24(3):422–30. doi: 10.1101/gr.164996.113 (PMC3941107; doi:10.1101/gr.164996.113), 2014-03
Supplement: supp_gr.164996.113_TableS1.pdf [file supp_gr.164996.113_TableS1.pdf]

**Table S1.** Numbers of sequence reads at each step of analysis. Raw reads include variable amounts of "adapter only" empty library. Library reads contain cloned RNA inserts. Contaminating rRNA reads made up 30% to 70% of the RPF library reads. As rRNA reads from RPF libraries map to both alleles, the fraction of allele-specific reads is reduced in RPF samples compared to mRNA samples.

| mRNA Sample                  | Species / Allele     | Raw        | Library    | Genome aligned | Allele-specific | ORF mapped | Normalized | Percent |
|------------------------------|----------------------|------------|------------|----------------|-----------------|------------|------------|---------|
| Separate Parents Replicate A | <i>S. paradoxus</i>  | 26,819,693 | 14,160,104 | 13,668,788     | 9,623,380       | 7,195,448  | 7,096,639  | 49.96   |
|                              | <i>S. cerevisiae</i> | 15,288,245 | 13,937,492 | 13,644,258     | 10,085,330      | 7,472,137  | 7,109,313  | 50.04   |
| Separate Parents Replicate B | <i>S. paradoxus</i>  | 15,222,810 | 13,364,839 | 13,087,419     | 9,434,828       | 7,281,735  | 7,190,496  | 49.96   |
|                              | <i>S. cerevisiae</i> | 15,250,639 | 13,978,236 | 13,670,183     | 10,084,366      | 7,440,143  | 7,201,063  | 50.04   |
| Hybrid Replicate A           | <i>S. paradoxus</i>  | 30,762,220 | 27,877,353 | 26,980,719     | 9,384,780       | 7,011,265  | 6,922,017  | 49.96   |
|                              | <i>S. cerevisiae</i> |            |            |                | 9,657,613       | 7,154,185  | 6,932,791  | 50.04   |
| Hybrid Replicate B           | <i>S. paradoxus</i>  | 27,700,697 | 25,067,868 | 24,382,810     | 8,741,552       | 6,560,924  | 6,454,933  | 49.99   |
|                              | <i>S. cerevisiae</i> |            |            |                | 8,798,257       | 6,599,162  | 6,456,613  | 50.01   |

  

| RPF Sample                   | Species / Allele     | Raw reads  | Library Reads | Aligned reads | Allele-specific | ORF mapped | Normalized | Percent |
|------------------------------|----------------------|------------|---------------|---------------|-----------------|------------|------------|---------|
| Separate Parents Replicate A | <i>S. paradoxus</i>  | 43,461,865 | 27,640,261    | 26,897,784    | 12,661,113      | 11,291,673 | 8,904,431  | 49.98   |
|                              | <i>S. cerevisiae</i> | 41,214,129 | 22,555,743    | 22,227,255    | 10,526,878      | 9,092,017  | 8,910,405  | 50.02   |
| Separate Parents Replicate B | <i>S. paradoxus</i>  | 76,161,853 | 36,517,084    | 35,509,272    | 7,247,861       | 6,199,193  | 6,116,133  | 49.95   |
|                              | <i>S. cerevisiae</i> | 38,244,257 | 27,960,534    | 27,568,540    | 10,495,172      | 8,827,413  | 6,127,161  | 50.05   |
| Hybrid Replicate A           | <i>S. paradoxus</i>  | 72,221,925 | 51,421,944    | 50,795,854    | 7,741,869       | 6,879,361  | 6,802,306  | 49.97   |
|                              | <i>S. cerevisiae</i> |            |               |               | 8,374,984       | 7,088,409  | 6,810,286  | 50.03   |
| Hybrid Replicate B           | <i>S. paradoxus</i>  | 97,125,729 | 62,984,843    | 62,255,282    | 8,724,669       | 7,700,918  | 7,615,853  | 49.97   |
|                              | <i>S. cerevisiae</i> |            |               |               | 9,313,643       | 7,894,827  | 7,624,928  | 50.03   |
