# Supplementary material for: Ribosome profiling reveals post-transcriptional buffering of divergent gene expression in yeast
Source: PubMed Central journal article supplement — Genome Res. 2014 Mar;24(3):422–30. doi: 10.1101/gr.164996.113 (PMC3941107; doi:10.1101/gr.164996.113), 2014-03
Supplement: supp_gr.164996.113_TableS2.pdf [file supp_gr.164996.113_TableS2.pdf]

**Table S2.** Numbers of genes in each category of regulatory divergence using different minimum read thresholds.

| Minimum Read Threshold | Divergent |       |                       | <i>cis</i> -acting |      |                       | <i>trans</i> -acting |       |                       | Buffered | Amplified |
|------------------------|-----------|-------|-----------------------|--------------------|------|-----------------------|----------------------|-------|-----------------------|----------|-----------|
|                        | RPF       | mRNA  | Efficiency (RPF/mRNA) | RPF                | mRNA | Efficiency (RPF/mRNA) | RPF                  | mRNA  | Efficiency (RPF/mRNA) |          |           |
| 10                     | 1,345     | 1,795 | 1,379                 | 601                | 668  | 682                   | 1,401                | 2,068 | 1,149                 | 574      | 104       |
| 20                     | 1,308     | 1,739 | 1,345                 | 580                | 631  | 652                   | 1,372                | 2,010 | 1,129                 | 560      | 101       |
| 50                     | 1,237     | 1,649 | 1,279                 | 528                | 578  | 591                   | 1,309                | 1,909 | 1,099                 | 538      | 88        |
| 100                    | 1,149     | 1,546 | 1,193                 | 457                | 516  | 510                   | 1,213                | 1,795 | 1,043                 | 500      | 69        |
