# Supplementary material for: Ribosome profiling reveals post-transcriptional buffering of divergent gene expression in yeast
Source: PubMed Central journal article supplement — Genome Res. 2014 Mar;24(3):422–30. doi: 10.1101/gr.164996.113 (PMC3941107; doi:10.1101/gr.164996.113), 2014-03
Supplement: supp_gr.164996.113_TableS4.pdf [file supp_gr.164996.113_TableS4.pdf]

**Table S4.** Gene ontology slim categories enriched in genes misexpressed at the mRNA abundance and ribosome occupancy (RPF) levels. RPF underdominant genes were not enriched in any gene functions.

| mRNA Underdominant (underexpressed) |                                                        |             |                                               |
|-------------------------------------|--------------------------------------------------------|-------------|-----------------------------------------------|
| term_ID                             | description                                            | log10pvalue | representative                                |
| GO:0000278                          | mitotic cell cycle                                     | -9.2487     | mitotic cell cycle                            |
| GO:0048285                          | organelle fission                                      | -4.8245     | mitotic cell cycle                            |
| GO:0000280                          | nuclear division                                       | -5.2541     | mitotic cell cycle                            |
| GO:0006996                          | organelle organization                                 | -4.7547     | mitotic cell cycle                            |
| GO:0044763                          | single-organism cellular process                       | -6.2454     | mitotic cell cycle                            |
| GO:0051276                          | chromosome organization                                | -3.8428     | mitotic cell cycle                            |
| GO:0007049                          | cell cycle                                             | -7.4622     | mitotic cell cycle                            |
| GO:0007059                          | chromosome segregation                                 | -3.2387     | mitotic cell cycle                            |
| GO:0051641                          | cellular localization                                  | -2.6559     | mitotic cell cycle                            |
| GO:0051301                          | cell division                                          | -5.1942     | mitotic cell cycle                            |
| GO:0009057                          | macromolecule catabolic process                        | -3.5642     | macromolecule catabolism                      |
| GO:0090304                          | nucleic acid metabolic process                         | -7.2549     | macromolecule catabolism                      |
| GO:0043632                          | modification-dependent macromolecule catabolic process | -2.9545     | macromolecule catabolism                      |
| GO:0006139                          | nucleobase-containing compound metabolic process       | -5.6396     | macromolecule catabolism                      |
| GO:0034641                          | cellular nitrogen compound metabolic process           | -4.2466     | macromolecule catabolism                      |
| GO:0006366                          | transcription from RNA polymerase II promoter          | -2.4759     | macromolecule catabolism                      |
| GO:0016070                          | RNA metabolic process                                  | -5.1353     | macromolecule catabolism                      |
| GO:0006464                          | cellular protein modification process                  | -2.0525     | macromolecule catabolism                      |
| GO:0044260                          | cellular macromolecule metabolic process               | -5.4987     | macromolecule catabolism                      |
| GO:0009987                          | cellular process                                       | -5.4116     | cellular process                              |
| GO:0044699                          | single-organism process                                | -5.2674     | single-organism process                       |
| GO:0065007                          | biological regulation                                  | -6.4058     | biological regulation                         |
| GO:0071840                          | cellular component organization or biogenesis          | -6.8034     | cellular component organization or biogenesis |
| GO:0050794                          | regulation of cellular process                         | -6.5348     | regulation of cellular process                |
| GO:0043170                          | macromolecule metabolic process                        | -4.7778     | macromolecule metabolism                      |
| GO:1901360                          | organic cyclic compound metabolic process              | -3.9786     | macromolecule metabolism                      |
| GO:0046483                          | heterocycle metabolic process                          | -4.6524     | heterocycle metabolism                        |
| GO:0006725                          | cellular aromatic compound metabolic process           | -4.6309     | heterocycle metabolism                        |
| GO:0006807                          | nitrogen compound metabolic process                    | -2.9407     | nitrogen compound metabolism                  |

| mRNA Overdominant (overexpressed) |                                                        |             |                                |
|-----------------------------------|--------------------------------------------------------|-------------|--------------------------------|
| term_ID                           | description                                            | log10pvalue | representative                 |
| GO:0006164                        | purine nucleotide biosynthetic process                 | -9.6069     | purine nucleotide biosynthesis |
| GO:1901576                        | organic substance biosynthetic process                 | -2.5486     | purine nucleotide biosynthesis |
| GO:0055086                        | nucleobase-containing small molecule metabolic process | -4.9392     | purine nucleotide biosynthesis |
| GO:1901564                        | organonitrogen compound metabolic process              | -10.6453    | purine nucleotide biosynthesis |
| GO:0046112                        | nucleobase biosynthetic process                        | -2.6326     | purine nucleotide biosynthesis |
| GO:1901566                        | organonitrogen compound biosynthetic process           | -9.519      | purine nucleotide biosynthesis |
| GO:1901137                        | carbohydrate derivative biosynthetic process           | -6.1664     | purine nucleotide biosynthesis |
| GO:1901605                        | alpha-amino acid metabolic process                     | -4.5918     | purine nucleotide biosynthesis |

|            |                                                 |          |                                    |
|------------|-------------------------------------------------|----------|------------------------------------|
| GO:0009123 | nucleoside monophosphate metabolic process      | -7.1679  | purine nucleotide biosynthesis     |
| GO:0044281 | small molecule metabolic process                | -8.7138  | purine nucleotide biosynthesis     |
| GO:0072522 | purine-containing compound biosynthetic process | -8.7296  | purine nucleotide biosynthesis     |
| GO:0072521 | purine-containing compound metabolic process    | -4.5616  | purine nucleotide biosynthesis     |
| GO:0006163 | purine nucleotide metabolic process             | -4.4721  | purine nucleotide biosynthesis     |
| GO:0090407 | organophosphate biosynthetic process            | -4.1909  | purine nucleotide biosynthesis     |
| GO:0046394 | carboxylic acid biosynthetic process            | -2.5264  | purine nucleotide biosynthesis     |
| GO:0019752 | carboxylic acid metabolic process               | -3.632   | purine nucleotide biosynthesis     |
| GO:0055114 | oxidation-reduction process                     | -2.8902  | purine nucleotide biosynthesis     |
| GO:0006082 | organic acid metabolic process                  | -3.378   | purine nucleotide biosynthesis     |
| GO:0042440 | pigment metabolic process                       | -3.1396  | purine nucleotide biosynthesis     |
| GO:0006811 | ion transport                                   | -2.3434  | ion transport                      |
| GO:0055085 | transmembrane transport                         | -2.8476  | ion transport                      |
| GO:0034220 | ion transmembrane transport                     | -2.415   | ion transport                      |
| GO:0008152 | metabolic process                               | -2.0516  | metabolism                         |
| GO:0009987 | cellular process                                | -2.5053  | cellular process                   |
| GO:0044710 | single-organism metabolic process               | -10.6148 | single-organism metabolism         |
| GO:1901135 | carbohydrate derivative metabolic process       | -4.7286  | carbohydrate derivative metabolism |
| GO:0009058 | biosynthetic process                            | -2.374   | biosynthesis                       |
| GO:0006793 | phosphorus metabolic process                    | -3.1591  | phosphorus metabolism              |

| RPF Overdominant (overexpressed) |                                                        |             |                                    |
|----------------------------------|--------------------------------------------------------|-------------|------------------------------------|
| term_ID                          | description                                            | log10pvalue | representative                     |
| GO:0006189                       | 'de novo' IMP biosynthetic process                     | -14.8967    | primede novoprime IMP biosynthesis |
| GO:0055086                       | nucleobase-containing small molecule metabolic process | -5.2224     | primede novoprime IMP biosynthesis |
| GO:1901564                       | organonitrogen compound metabolic process              | -8.0014     | primede novoprime IMP biosynthesis |
| GO:0046112                       | nucleobase biosynthetic process                        | -4.9137     | primede novoprime IMP biosynthesis |
| GO:1901566                       | organonitrogen compound biosynthetic process           | -8.7202     | primede novoprime IMP biosynthesis |
| GO:1901137                       | carbohydrate derivative biosynthetic process           | -4.0189     | primede novoprime IMP biosynthesis |
| GO:1901605                       | alpha-amino acid metabolic process                     | -5.7854     | primede novoprime IMP biosynthesis |
| GO:0019438                       | aromatic compound biosynthetic process                 | -2.0551     | primede novoprime IMP biosynthesis |
| GO:0009123                       | nucleoside monophosphate metabolic process             | -9.6858     | primede novoprime IMP biosynthesis |
| GO:0044281                       | small molecule metabolic process                       | -7.3388     | primede novoprime IMP biosynthesis |
| GO:0072522                       | purine-containing compound biosynthetic process        | -12.6204    | primede novoprime IMP biosynthesis |
| GO:0072521                       | purine-containing compound metabolic process           | -7.3924     | primede novoprime IMP biosynthesis |
| GO:0006163                       | purine nucleotide metabolic process                    | -5.6913     | primede novoprime IMP biosynthesis |
| GO:0090407                       | organophosphate biosynthetic process                   | -3.8273     | primede novoprime IMP biosynthesis |
| GO:0019878                       | lysine biosynthetic process via amino adipic acid      | -2.3469     | primede novoprime IMP biosynthesis |
| GO:0019752                       | carboxylic acid metabolic process                      | -5.2161     | primede novoprime IMP biosynthesis |
| GO:0006082                       | organic acid metabolic process                         | -5.0142     | primede novoprime IMP biosynthesis |
| GO:0009066                       | aspartate family amino acid metabolic process          | -3.3552     | primede novoprime IMP biosynthesis |
| GO:0042440                       | pigment metabolic process                              | -5.8078     | primede novoprime IMP biosynthesis |
| GO:0044710                       | single-organism metabolic process                      | -7.1985     | single-organism metabolism         |
| GO:1901135                       | carbohydrate derivative metabolic process              | -2.4313     | carbohydrate derivative metabolism |
