# Supplementary material for: Ribosome profiling reveals post-transcriptional buffering of divergent gene expression in yeast
Source: PubMed Central journal article supplement — Genome Res. 2014 Mar;24(3):422–30. doi: 10.1101/gr.164996.113 (PMC3941107; doi:10.1101/gr.164996.113), 2014-03
Supplement: supp_gr.164996.113_TableS5_pg1.pdf [file supp_gr.164996.113_TableS5_pg1.pdf]

**Table S5.** Overview of normalized readcounts and results of statistical tests for divergent expression, and *cis*- and *trans*-regulatory divergence. "Eff" denotes translation efficiency (RPF / mRNA). Percent cis denotes the percentage of regulatory divergence attributable to *cis*-regulatory differences. "Padj" denotes p-values adjusted for FDR correction using the Benjamini-Hothberg method.

| Gene | Mixed Parental RPF (ribosome occupancy) read counts |       |                     |       | Mixed Parental mRNA read counts |       |                     |       | F1 hybrid RPF (ribosome occupancy) read counts |       |                     |       | F1 hybrid mRNA read counts |       |                     |       | Ratios between Species |       |       | Ratios between Alleles in F1 hybrid |       |       | Percent cis |       |       | Adjusted P-values for tests of divergent expression |       |       |       |       | Adjusted P-values for cis-regulatory divergence in F1 Hybrids |       |       |       |       | Adjusted P-values for tests of trans-regulatory divergence |       |       |       |       | TAI   |       |       |       |       |       |       |       |       |       |       |       |       |       |       |       |       |       |       |       |       |       |       |       |       |       |       |       |       |       |       |       |       |       |       |       |       |       |       |       |       |       |       |       |       |       |       |       |       |       |       |       |       |       |       |       |       |       |       |       |       |       |       |       |       |       |       |       |       |       |       |       |       |       |       |       |       |       |       |       |       |       |       |       |       |       |       |       |       |       |       |       |       |       |       |       |       |       |       |       |       |       |       |       |       |       |       |       |       |       |       |       |       |       |       |       |       |       |       |       |       |       |       |       |       |       |       |       |       |       |       |       |       |       |       |       |       |       |       |       |       |       |       |       |       |       |       |       |       |       |       |       |       |       |       |       |       |       |       |       |       |       |       |       |       |       |       |       |       |       |       |       |       |       |       |       |       |       |       |       |       |       |       |       |       |       |       |       |       |       |       |       |       |       |       |       |       |       |       |       |       |       |       |       |       |       |       |       |       |       |       |       |       |       |       |       |       |       |       |       |       |       |       |       |       |       |       |       |       |       |       |       |       |       |       |       |       |       |       |       |       |       |       |       |       |       |       |       |       |       |       |       |       |       |       |       |       |       |       |       |       |       |       |       |       |       |       |       |       |       |       |       |       |       |       |       |       |       |       |       |       |       |       |       |       |       |       |       |       |       |       |       |       |       |       |       |       |       |       |       |       |       |       |       |       |       |       |       |       |       |       |       |       |       |       |       |       |       |       |       |       |       |       |       |       |       |       |       |       |       |       |       |       |       |       |       |       |       |       |       |       |       |       |       |       |       |       |       |       |       |       |       |       |       |       |       |       |       |       |       |       |       |       |       |       |       |       |       |       |       |       |       |       |       |       |       |       |       |       |       |       |       |       |       |       |       |       |       |       |       |       |       |       |       |       |       |       |       |       |       |       |       |       |       |       |       |       |       |       |       |       |       |       |       |       |       |       |       |       |       |       |       |       |       |       |       |       |       |       |       |       |       |       |       |       |       |       |       |       |       |       |       |       |       |       |       |       |       |       |       |       |       |       |       |       |       |       |       |       |       |       |       |       |       |       |       |       |       |       |       |       |       |       |       |       |       |       |       |       |       |       |       |       |       |       |       |       |       |       |       |       |       |       |       |       |       |       |       |       |       |       |       |       |       |       |       |       |       |       |       |       |       |       |       |       |       |       |       |       |       |       |       |       |       |       |       |       |       |       |       |       |       |       |       |       |       |       |       |       |       |       |       |       |       |       |       |       |       |       |       |       |       |       |       |       |       |       |       |       |       |       |       |       |       |       |       |       |       |       |       |       |       |       |       |       |       |       |       |       |       |       |       |       |       |       |       |       |       |       |       |       |       |       |       |       |       |       |       |       |       |       |       |       |       |       |       |       |       |       |       |       |       |       |       |       |       |       |       |       |       |       |       |       |       |       |       |       |       |       |       |       |       |       |       |       |       |       |       |       |       |       |       |       |       |       |       |       |       |       |       |       |       |       |       |       |       |       |       |       |       |       |       |       |       |       |       |       |       |       |       |       |       |       |       |       |       |       |       |       |       |       |       |       |       |       |       |       |       |       |       |       |       |       |       |       |       |       |       |       |       |       |       |       |       |       |       |       |       |       |       |       |       |       |       |       |       |       |       |       |       |       |       |       |       |       |       |       |       |       |       |       |       |       |       |       |       |       |       |       |       |       |
|------|-----------------------------------------------------|-------|---------------------|-------|---------------------------------|-------|---------------------|-------|------------------------------------------------|-------|---------------------|-------|----------------------------|-------|---------------------|-------|------------------------|-------|-------|-------------------------------------|-------|-------|-------------|-------|-------|-----------------------------------------------------|-------|-------|-------|-------|---------------------------------------------------------------|-------|-------|-------|-------|------------------------------------------------------------|-------|-------|-------|-------|-------|-------|-------|-------|-------|-------|-------|-------|-------|-------|-------|-------|-------|-------|-------|-------|-------|-------|-------|-------|-------|-------|-------|-------|-------|-------|-------|-------|-------|-------|-------|-------|-------|-------|-------|-------|-------|-------|-------|-------|-------|-------|-------|-------|-------|-------|-------|-------|-------|-------|-------|-------|-------|-------|-------|-------|-------|-------|-------|-------|-------|-------|-------|-------|-------|-------|-------|-------|-------|-------|-------|-------|-------|-------|-------|-------|-------|-------|-------|-------|-------|-------|-------|-------|-------|-------|-------|-------|-------|-------|-------|-------|-------|-------|-------|-------|-------|-------|-------|-------|-------|-------|-------|-------|-------|-------|-------|-------|-------|-------|-------|-------|-------|-------|-------|-------|-------|-------|-------|-------|-------|-------|-------|-------|-------|-------|-------|-------|-------|-------|-------|-------|-------|-------|-------|-------|-------|-------|-------|-------|-------|-------|-------|-------|-------|-------|-------|-------|-------|-------|-------|-------|-------|-------|-------|-------|-------|-------|-------|-------|-------|-------|-------|-------|-------|-------|-------|-------|-------|-------|-------|-------|-------|-------|-------|-------|-------|-------|-------|-------|-------|-------|-------|-------|-------|-------|-------|-------|-------|-------|-------|-------|-------|-------|-------|-------|-------|-------|-------|-------|-------|-------|-------|-------|-------|-------|-------|-------|-------|-------|-------|-------|-------|-------|-------|-------|-------|-------|-------|-------|-------|-------|-------|-------|-------|-------|-------|-------|-------|-------|-------|-------|-------|-------|-------|-------|-------|-------|-------|-------|-------|-------|-------|-------|-------|-------|-------|-------|-------|-------|-------|-------|-------|-------|-------|-------|-------|-------|-------|-------|-------|-------|-------|-------|-------|-------|-------|-------|-------|-------|-------|-------|-------|-------|-------|-------|-------|-------|-------|-------|-------|-------|-------|-------|-------|-------|-------|-------|-------|-------|-------|-------|-------|-------|-------|-------|-------|-------|-------|-------|-------|-------|-------|-------|-------|-------|-------|-------|-------|-------|-------|-------|-------|-------|-------|-------|-------|-------|-------|-------|-------|-------|-------|-------|-------|-------|-------|-------|-------|-------|-------|-------|-------|-------|-------|-------|-------|-------|-------|-------|-------|-------|-------|-------|-------|-------|-------|-------|-------|-------|-------|-------|-------|-------|-------|-------|-------|-------|-------|-------|-------|-------|-------|-------|-------|-------|-------|-------|-------|-------|-------|-------|-------|-------|-------|-------|-------|-------|-------|-------|-------|-------|-------|-------|-------|-------|-------|-------|-------|-------|-------|-------|-------|-------|-------|-------|-------|-------|-------|-------|-------|-------|-------|-------|-------|-------|-------|-------|-------|-------|-------|-------|-------|-------|-------|-------|-------|-------|-------|-------|-------|-------|-------|-------|-------|-------|-------|-------|-------|-------|-------|-------|-------|-------|-------|-------|-------|-------|-------|-------|-------|-------|-------|-------|-------|-------|-------|-------|-------|-------|-------|-------|-------|-------|-------|-------|-------|-------|-------|-------|-------|-------|-------|-------|-------|-------|-------|-------|-------|-------|-------|-------|-------|-------|-------|-------|-------|-------|-------|-------|-------|-------|-------|-------|-------|-------|-------|-------|-------|-------|-------|-------|-------|-------|-------|-------|-------|-------|-------|-------|-------|-------|-------|-------|-------|-------|-------|-------|-------|-------|-------|-------|-------|-------|-------|-------|-------|-------|-------|-------|-------|-------|-------|-------|-------|-------|-------|-------|-------|-------|-------|-------|-------|-------|-------|-------|-------|-------|-------|-------|-------|-------|-------|-------|-------|-------|-------|-------|-------|-------|-------|-------|-------|-------|-------|-------|-------|-------|-------|-------|-------|-------|-------|-------|-------|-------|-------|-------|-------|-------|-------|-------|-------|-------|-------|-------|-------|-------|-------|-------|-------|-------|-------|-------|-------|-------|-------|-------|-------|-------|-------|-------|-------|-------|-------|-------|-------|-------|-------|-------|-------|-------|-------|-------|-------|-------|-------|-------|-------|-------|-------|-------|-------|-------|-------|-------|-------|-------|-------|-------|-------|-------|-------|-------|-------|-------|-------|-------|-------|-------|-------|-------|-------|-------|-------|-------|-------|-------|-------|-------|-------|-------|-------|-------|-------|-------|-------|-------|-------|-------|-------|-------|-------|-------|-------|-------|-------|-------|-------|-------|-------|-------|-------|-------|-------|-------|-------|-------|-------|-------|-------|-------|-------|-------|-------|-------|-------|-------|-------|-------|-------|-------|-------|-------|-------|-------|-------|-------|-------|-------|-------|-------|-------|-------|-------|-------|-------|-------|-------|-------|-------|-------|-------|-------|-------|-------|-------|-------|-------|-------|-------|-------|-------|-------|-------|-------|-------|-------|-------|-------|-------|-------|-------|-------|-------|-------|-------|-------|-------|-------|-------|-------|-------|-------|-------|-------|-------|-------|-------|-------|-------|
|      | <i>S. cerevisiae</i>                                |       | <i>S. paradoxus</i> |       | <i>S. cerevisiae</i>            |       | <i>S. paradoxus</i> |       | <i>S. cerevisiae</i>                           |       | <i>S. paradoxus</i> |       | <i>S. cerevisiae</i>       |       | <i>S. paradoxus</i> |       |                        |       |       |                                     |       |       |             |       |       | mRNA                                                |       | RPF   |       | Eff   |                                                               | mRNA  |       | RPF   |       | Eff                                                        |       | mRNA  |       | RPF   |       |       | Eff   |       | mRNA  |       | RPF   |       | Eff   |       |       |       |       |       |       |       |       |       |       |       |       |       |       |       |       |       |       |       |       |       |       |       |       |       |       |       |       |       |       |       |       |       |       |       |       |       |       |       |       |       |       |       |       |       |       |       |       |       |       |       |       |       |       |       |       |       |       |       |       |       |       |       |       |       |       |       |       |       |       |       |       |       |       |       |       |       |       |       |       |       |       |       |       |       |       |       |       |       |       |       |       |       |       |       |       |       |       |       |       |       |       |       |       |       |       |       |       |       |       |       |       |       |       |       |       |       |       |       |       |       |       |       |       |       |       |       |       |       |       |       |       |       |       |       |       |       |       |       |       |       |       |       |       |       |       |       |       |       |       |       |       |       |       |       |       |       |       |       |       |       |       |       |       |       |       |       |       |       |       |       |       |       |       |       |       |       |       |       |       |       |       |       |       |       |       |       |       |       |       |       |       |       |       |       |       |       |       |       |       |       |       |       |       |       |       |       |       |       |       |       |       |       |       |       |       |       |       |       |       |       |       |       |       |       |       |       |       |       |       |       |       |       |       |       |       |       |       |       |       |       |       |       |       |       |       |       |       |       |       |       |       |       |       |       |       |       |       |       |       |       |       |       |       |       |       |       |       |       |       |       |       |       |       |       |       |       |       |       |       |       |       |       |       |       |       |       |       |       |       |       |       |       |       |       |       |       |       |       |       |       |       |       |       |       |       |       |       |       |       |       |       |       |       |       |       |       |       |       |       |       |       |       |       |       |       |       |       |       |       |       |       |       |       |       |       |       |       |       |       |       |       |       |       |       |       |       |       |       |       |       |       |       |       |       |       |       |       |       |       |       |       |       |       |       |       |       |       |       |       |       |       |       |       |       |       |       |       |       |       |       |       |       |       |       |       |       |       |       |       |       |       |       |       |       |       |       |       |       |       |       |       |       |       |       |       |       |       |       |       |       |       |       |       |       |       |       |       |       |       |       |       |       |       |       |       |       |       |       |       |       |       |       |       |       |       |       |       |       |       |       |       |       |       |       |       |       |       |       |       |       |       |       |       |       |       |       |       |       |       |       |       |       |       |       |       |       |       |       |       |       |       |       |       |       |       |       |       |       |       |       |       |       |       |       |       |       |       |       |       |       |       |       |       |       |       |       |       |       |       |       |       |       |       |       |       |       |       |       |       |       |       |       |       |       |       |       |       |       |       |       |       |       |       |       |       |       |       |       |       |       |       |       |       |       |       |       |       |       |       |       |       |       |       |       |       |       |       |       |       |       |       |       |       |       |       |       |       |       |       |       |       |       |       |       |       |       |       |       |       |       |       |       |       |       |       |       |       |       |       |       |       |       |       |       |       |       |       |       |       |       |       |       |       |       |       |       |       |       |       |       |       |       |       |       |       |       |       |       |       |       |       |       |       |       |       |       |       |       |       |       |       |       |       |       |       |       |       |       |       |       |       |       |       |       |       |       |       |       |       |       |       |       |       |       |       |       |       |       |       |       |       |       |       |       |       |       |       |       |       |       |       |       |       |       |       |       |       |       |       |       |       |       |       |       |       |       |       |       |       |       |       |       |       |       |       |       |       |       |       |       |       |       |       |       |       |       |       |       |       |       |       |       |       |       |       |       |       |       |       |       |       |       |       |       |       |       |       |       |       |       |       |       |       |       |       |       |       |       |       |       |       |
|      | Rep A                                               | Rep B | Rep A               | Rep B | Rep A                           | Rep B | Rep A               | Rep B | Rep A                                          | Rep B | Rep A               | Rep B | Rep A                      | Rep B | Rep A               | Rep B | Rep A                  | Rep B | Rep A | Rep B                               | Rep A | Rep B | Rep A       | Rep B | Rep A | Rep B                                               | Rep A | Rep B | Rep A | Rep B | Rep A                                                         | Rep B | Rep A | Rep B | Rep A | Rep B                                                      | Rep A | Rep B | Rep A | Rep B | Rep A | Rep B | Rep A | Rep B | Rep A | Rep B | Rep A | Rep B | Rep A | Rep B | Rep A | Rep B | Rep A | Rep B | Rep A | Rep B | Rep A | Rep B | Rep A | Rep B | Rep A | Rep B | Rep A | Rep B | Rep A | Rep B | Rep A | Rep B | Rep A | Rep B | Rep A | Rep B | Rep A | Rep B | Rep A | Rep B | Rep A | Rep B | Rep A | Rep B | Rep A | Rep B | Rep A | Rep B | Rep A | Rep B | Rep A | Rep B | Rep A | Rep B | Rep A | Rep B | Rep A | Rep B | Rep A | Rep B | Rep A | Rep B | Rep A | Rep B | Rep A | Rep B | Rep A | Rep B | Rep A | Rep B | Rep A | Rep B | Rep A | Rep B | Rep A | Rep B | Rep A | Rep B | Rep A | Rep B | Rep A | Rep B | Rep A | Rep B | Rep A | Rep B | Rep A | Rep B | Rep A | Rep B | Rep A | Rep B | Rep A | Rep B | Rep A | Rep B | Rep A | Rep B | Rep A | Rep B | Rep A | Rep B | Rep A | Rep B | Rep A | Rep B | Rep A | Rep B | Rep A | Rep B | Rep A | Rep B | Rep A | Rep B | Rep A | Rep B | Rep A | Rep B | Rep A | Rep B | Rep A | Rep B | Rep A | Rep B | Rep A | Rep B | Rep A | Rep B | Rep A | Rep B | Rep A | Rep B | Rep A | Rep B | Rep A | Rep B | Rep A | Rep B | Rep A | Rep B | Rep A | Rep B | Rep A | Rep B | Rep A | Rep B | Rep A | Rep B | Rep A | Rep B | Rep A | Rep B | Rep A | Rep B | Rep A | Rep B | Rep A | Rep B | Rep A | Rep B | Rep A | Rep B | Rep A | Rep B | Rep A | Rep B | Rep A | Rep B | Rep A | Rep B | Rep A | Rep B | Rep A | Rep B | Rep A | Rep B | Rep A | Rep B | Rep A | Rep B | Rep A | Rep B | Rep A | Rep B | Rep A | Rep B | Rep A | Rep B | Rep A | Rep B | Rep A | Rep B | Rep A | Rep B | Rep A | Rep B | Rep A | Rep B | Rep A | Rep B | Rep A | Rep B | Rep A | Rep B | Rep A | Rep B | Rep A | Rep B | Rep A | Rep B | Rep A | Rep B | Rep A | Rep B | Rep A | Rep B | Rep A | Rep B | Rep A | Rep B | Rep A | Rep B | Rep A | Rep B | Rep A | Rep B | Rep A | Rep B | Rep A | Rep B | Rep A | Rep B | Rep A | Rep B | Rep A | Rep B | Rep A | Rep B | Rep A | Rep B | Rep A | Rep B | Rep A | Rep B | Rep A | Rep B | Rep A | Rep B | Rep A | Rep B | Rep A | Rep B | Rep A | Rep B | Rep A | Rep B | Rep A | Rep B | Rep A | Rep B | Rep A | Rep B | Rep A | Rep B | Rep A | Rep B | Rep A | Rep B | Rep A | Rep B | Rep A | Rep B | Rep A | Rep B | Rep A | Rep B | Rep A | Rep B | Rep A | Rep B | Rep A | Rep B | Rep A | Rep B | Rep A | Rep B | Rep A | Rep B | Rep A | Rep B | Rep A | Rep B | Rep A | Rep B | Rep A | Rep B | Rep A | Rep B | Rep A | Rep B | Rep A | Rep B | Rep A | Rep B | Rep A | Rep B | Rep A | Rep B | Rep A | Rep B | Rep A | Rep B | Rep A | Rep B | Rep A | Rep B | Rep A | Rep B | Rep A | Rep B | Rep A | Rep B | Rep A | Rep B | Rep A | Rep B | Rep A | Rep B | Rep A | Rep B | Rep A | Rep B | Rep A | Rep B | Rep A | Rep B | Rep A | Rep B | Rep A | Rep B | Rep A | Rep B | Rep A | Rep B | Rep A | Rep B | Rep A | Rep B | Rep A | Rep B | Rep A | Rep B | Rep A | Rep B | Rep A | Rep B | Rep A | Rep B | Rep A | Rep B | Rep A | Rep B | Rep A | Rep B | Rep A | Rep B | Rep A | Rep B | Rep A | Rep B | Rep A | Rep B | Rep A | Rep B | Rep A | Rep B | Rep A | Rep B | Rep A | Rep B | Rep A | Rep B | Rep A | Rep B | Rep A | Rep B | Rep A | Rep B | Rep A | Rep B | Rep A | Rep B | Rep A | Rep B | Rep A | Rep B | Rep A | Rep B | Rep A | Rep B | Rep A | Rep B | Rep A | Rep B | Rep A | Rep B | Rep A | Rep B | Rep A | Rep B | Rep A | Rep B | Rep A | Rep B | Rep A | Rep B | Rep A | Rep B | Rep A | Rep B | Rep A | Rep B | Rep A | Rep B | Rep A | Rep B | Rep A | Rep B | Rep A | Rep B | Rep A | Rep B | Rep A | Rep B | Rep A | Rep B | Rep A | Rep B | Rep A | Rep B | Rep A | Rep B | Rep A | Rep B | Rep A | Rep B | Rep A | Rep B | Rep A | Rep B | Rep A | Rep B | Rep A | Rep B | Rep A | Rep B | Rep A | Rep B | Rep A | Rep B | Rep A | Rep B | Rep A | Rep B | Rep A | Rep B | Rep A | Rep B | Rep A | Rep B | Rep A | Rep B | Rep A | Rep B | Rep A | Rep B | Rep A | Rep B | Rep A | Rep B | Rep A | Rep B | Rep A | Rep B | Rep A | Rep B | Rep A | Rep B | Rep A | Rep B | Rep A | Rep B | Rep A | Rep B | Rep A | Rep B | Rep A | Rep B | Rep A | Rep B | Rep A | Rep B | Rep A | Rep B | Rep A | Rep B | Rep A | Rep B | Rep A | Rep B | Rep A | Rep B | Rep A | Rep B | Rep A | Rep B | Rep A | Rep B | Rep A | Rep B | Rep A | Rep B | Rep A | Rep B | Rep A | Rep B | Rep A | Rep B | Rep A | Rep B | Rep A | Rep B | Rep A | Rep B | Rep A | Rep B | Rep A | Rep B | Rep A | Rep B | Rep A | Rep B | Rep A | Rep B | Rep A | Rep B | Rep A | Rep B | Rep A | Rep B | Rep A | Rep B | Rep A | Rep B | Rep A | Rep B | Rep A | Rep B | Rep A | Rep B | Rep A | Rep B | Rep A | Rep B | Rep A | Rep B | Rep A | Rep B | Rep A | Rep B | Rep A | Rep B | Rep A | Rep B | Rep A | Rep B | Rep A | Rep B | Rep A | Rep B | Rep A | Rep B | Rep A | Rep B | Rep A | Rep B | Rep A | Rep B | Rep A | Rep B | Rep A | Rep B | Rep A | Rep B | Rep A | Rep B | Rep A | Rep B | Rep A | Rep B | Rep A | Rep B | Rep A | Rep B | Rep A | Rep B | Rep A | Rep B | Rep A | Rep B | Rep A | Rep B | Rep A | Rep B | Rep A | Rep B | Rep A | Rep B | Rep A | Rep B | Rep A | Rep B | Rep A | Rep B | Rep A | Rep B | Rep A | Rep B | Rep A | Rep B | Rep A | Rep B | Rep A | Rep B | Rep A | Rep B | Rep A | Rep B | Rep A | Rep B | Rep A | Rep B | Rep A | Rep B | Rep A | Rep B | Rep A | Rep B | Rep A | Rep B | Rep A | Rep B | Rep A | Rep B | Rep A | Rep B | Rep A | Rep B | Rep A | Rep B | Rep A | Rep B | Rep A | Rep B | Rep A | Rep B | Rep A | Rep B | Rep A | Rep B | Rep A | Rep B | Rep A | Rep B | Rep A | Rep B | Rep A | Rep B | Rep A | Rep B | Rep A | Rep B | Rep A | Rep B | Rep A | Rep B | Rep A | Rep B | Rep A | Rep B | Rep A | Rep B | Rep A | Rep B | Rep A | Rep B | Rep A | Rep B | Rep A | Rep B | Rep A | Rep B | Rep A | Rep B | Rep A | Rep B | Rep A | Rep B | Rep A | Rep B | Rep A | Rep B | Rep A | Rep B | Rep A | Rep B | Rep A | Rep B | Rep A | Rep B | Rep A | Rep B | Rep A | Rep B | Rep A | Rep B | Rep A | Rep B | Rep A | Rep B | Rep A | Rep B | Rep A | Rep B | Rep A | Rep B | Rep A | Rep B | Rep A | Rep B | Rep A | Rep B | Rep A | Rep B | Rep A |
