# Supplementary figures and images for: Ribosome profiling reveals post-transcriptional buffering of divergent gene expression in yeast
Source: PubMed Central journal article supplement — Genome Res. 2014 Mar;24(3):422–30. doi: 10.1101/gr.164996.113 (PMC3941107; doi:10.1101/gr.164996.113), 2014-03

Figure S1

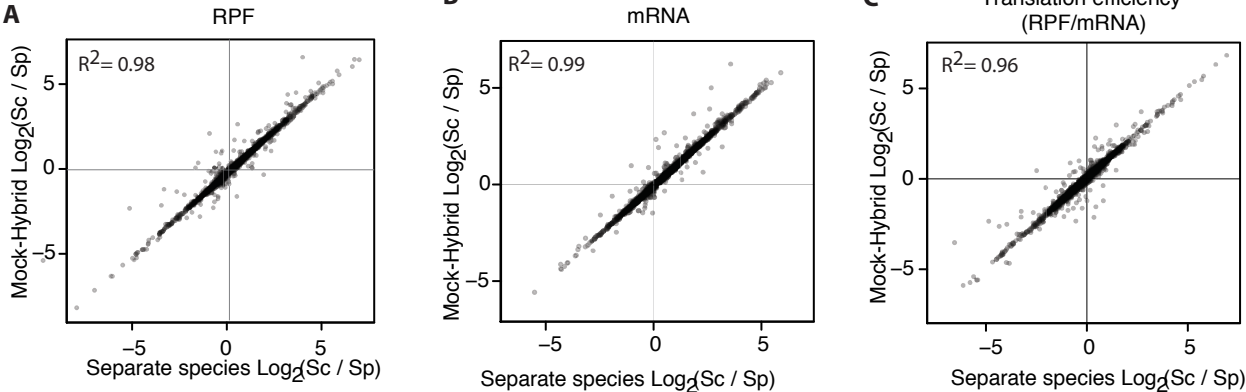

Supplement: supp_gr.164996.113_FigS1.pdf [file supp_gr.164996.113_FigS1.pdf]

Figure S3

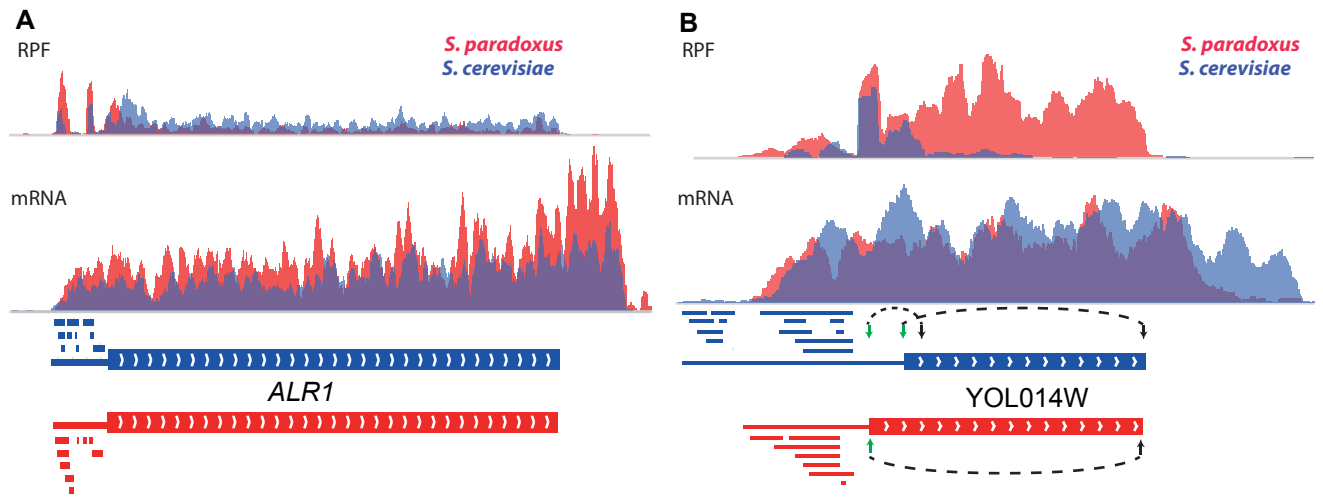

Supplement: supp_gr.164996.113_FigS3.pdf [file supp_gr.164996.113_FigS3.pdf]

Figure S4

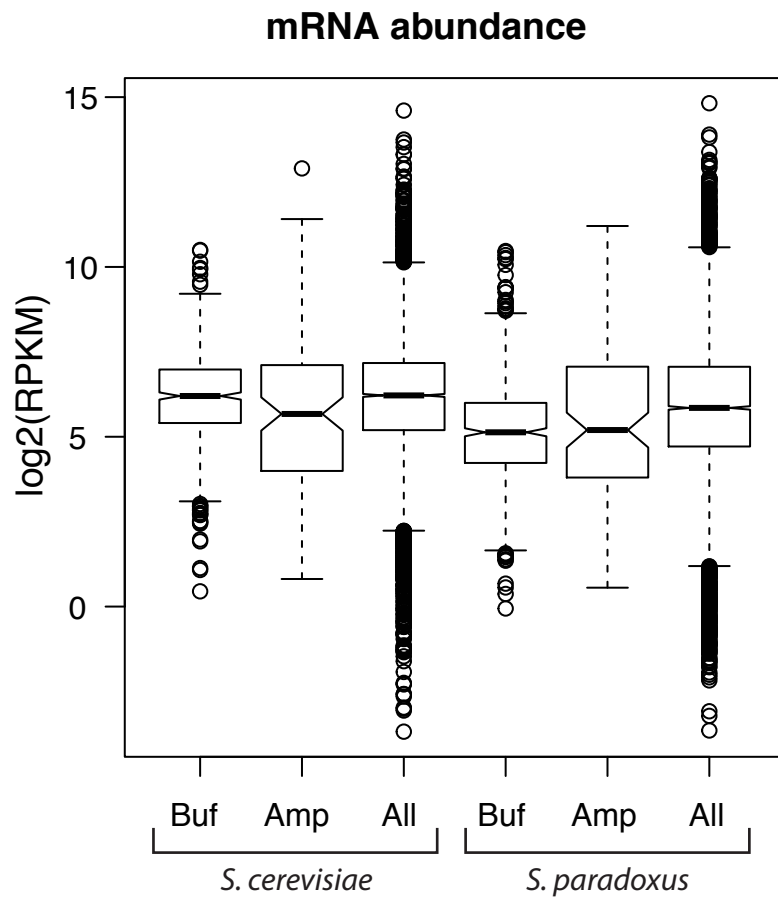

Supplement: supp_gr.164996.113_FigS4.pdf [file supp_gr.164996.113_FigS4.pdf]
